# Supplementary material
Source: PubMed Central journal article supplement (PMC5618103)
Supplement: NIHMS852118-supplement-Supplemental_Information.pdf [file NIHMS852118-supplement-Supplemental_Information.pdf]

## Supporting Information

### **Antibiotic Pollution in Marine Food Webs in Laizhou Bay, North**

#### **China: Trophodynamics and Human Exposure Implication**

Sisi Liu,<sup>†</sup> Hongxia Zhao,<sup>\*†</sup> Hans-Joachim Lehmler,<sup>§</sup> Xiyun Cai,<sup>†</sup> Jingwen Chen<sup>\*†</sup>

<sup>†</sup> Key Laboratory of Industrial Ecology and Environmental Engineering (Ministry of Education), School of Environmental Science and Technology, Dalian University of Technology, Linggong Road 2, Dalian 116024, China

<sup>§</sup> Department of Occupational and Environmental Health, College of Public Health, The University of Iowa, IA 52242, USA

#### **Corresponding Authors**

\* Hongxia Zhao, phone/fax: +86-411-8470 7965, e-mail: [hxzhao@dlut.edu.cn](mailto:hxzhao@dlut.edu.cn), address: Linggong Road 2, Ganjingzi District, Dalian 116024, China; Jingwen Chen, phone/fax: +86-411-8470 6269, e-mail: [jwchen@dlut.edu.cn](mailto:jwchen@dlut.edu.cn), address: Linggong Road 2, Ganjingzi District, Dalian 116024, China.

Number of pages: 40

Number of tables: 10

Number of figures: 4

## Table of Contents

|                                                                 |     |
|-----------------------------------------------------------------|-----|
| Chemicals and Reagents.....                                     | S4  |
| Sample Extraction and Cleanup.....                              | S5  |
| Stable Isotope Analysis.....                                    | S6  |
| Estimation of Trophic Magnification Factors ( <i>TMF</i> )..... | S7  |
| Determination of Relative Carbon Sources .....                  | S8  |
| Determination of Estimated Daily Intakes ( <i>EDI</i> ).....    | S9  |
| Determination of Hazard Quotients ( <i>HQ</i> ). .....          | S10 |

## List of Tables

|                                                                                                                                                                                                                                                                                         |     |
|-----------------------------------------------------------------------------------------------------------------------------------------------------------------------------------------------------------------------------------------------------------------------------------------|-----|
| <b>Table S1.</b> Physicochemical properties of antibiotics investigated in this study. ....                                                                                                                                                                                             | S11 |
| <b>Table S2.</b> Summary of the average body lengths and body weights of the specimens collected from Laizhou Bay, China, and the corresponding sampling locations and sampling times. ....                                                                                             | S13 |
| <b>Table S3.</b> Optimized LC-MS/MS parameters and retention times of the antibiotics analyzed in the present study. ....                                                                                                                                                               | S15 |
| <b>Table S4.</b> Surrogate standards, linear range of matrix matched calibration curves, method detection limits (MLOD), method quantification limits (MLOQ), spiked average recoveries and relative standard deviations (RSD, $n = 6$ ) for each antibiotic.17                         |     |
| <b>Table S5.</b> Detection frequency of the target antibiotics in all samples. ....                                                                                                                                                                                                     | S19 |
| <b>Table S6.</b> Moisture content (%), estimated trophic level ( <i>TL</i> ), mean concentrations in ng/g ww (ng/g dw) of sulfonamide, fluoroquinolone, macrolide antibiotics and trimethoprim, and detection frequency (%) in different species collected from Laizhou Bay, China..... | S20 |
| <b>Table S7.</b> Comparison of antibiotic levels detected in aquatic animals in areas around the world. ....                                                                                                                                                                            | S23 |

|                                                                                                                                                                                                                                                                                                                     |                                       |
|---------------------------------------------------------------------------------------------------------------------------------------------------------------------------------------------------------------------------------------------------------------------------------------------------------------------|---------------------------------------|
| <b>Table S8.</b> Analysis of variance (ANOVA) of the calculated trophic level ( <i>TL</i> ) values at different sampling times. ....                                                                                                                                                                                | S25                                   |
| <b>Table S9.</b> Slope, correlation coefficients ( <i>r</i> ) and <i>p</i> -values of regression analyses between logarithm concentrations and trophic levels (see Figure 3), and <i>TMFs</i> and 95% confidence intervals ( <i>CIs</i> ) of target antibiotics and $\Sigma$ SAs, $\Sigma$ FQs, $\Sigma$ MLs. ....  | S25                                   |
| <b>Table S10.</b> 90 <sup>th</sup> percentile antibiotic concentrations ( <i>C</i> ), estimation daily intake ( <i>EDI</i> ) values and associated hazard quotients ( <i>HQ</i> ) of antibiotics for rural and urban residents and acceptable daily intake ( <i>ADI</i> ) values obtained from the literature. .... | S28                                   |
| <b>List of Figures</b>                                                                                                                                                                                                                                                                                              |                                       |
| <b>Figure S1.</b> Sampling locations of this study. ....                                                                                                                                                                                                                                                            | S31                                   |
| <b>Figure S2.</b> $\delta^{15}\text{N}$ and adjusted $\delta^{13}\text{C}$ values for the species in the coastal food web from Laizhou Bay, China. ....                                                                                                                                                             | S32                                   |
| <b>Figure S3.</b> Significant difference ( $p < 0.05$ ) on fraction of neutral molecules ( $f_n$ ) values between SA antibiotics (including TMP) and the other two antibiotic groups. ....                                                                                                                          | <b>SError! Bookmark not defined.3</b> |
| <b>Figure S4.</b> Hazard quotients ( <i>HQ</i> ) of antibiotics for rural and urban residents based on consumption of seafood only. ....                                                                                                                                                                            | S344                                  |
| <b>References</b> .....                                                                                                                                                                                                                                                                                             | S355                                  |

**Chemicals and Reagents.** Sulfadiazine (SDZ), sulfathiazole (ST), sulfapyridine (SPD), sulfamerazine (SMZ), sulfadimidine (SDM), sulfamethoxazole (SMX), sulfadimethoxine (SM2), sulfamonomethoxine (SMM), sulfachlorpyridazine (SCP), trimethoprim (TMP), enoxacin (ENX), ofloxacin (OFL), ciprofloxacin (CIP), norfloxacin (NOR), enrofloxacin (ENR), roxithromycin (ROX), and anhydroerythromycin (ERY-H<sub>2</sub>O) were purchased from Dr. Ehrenstorfer GmbH (Augsburg, Germany). Azithromycin (AZI) was obtained from Fluorochem Co., Ltd (Derbyshire, UK). Clarithromycin (CLA) were provided by TCI Co., Ltd (Shanghai, China). Stable isotope-labeled compounds, including sulfamethoxazole-D<sub>4</sub>, atrazine-D<sub>5</sub>, trimethoprim-D<sub>3</sub>, ciprofloxacin-D<sub>8</sub>, and caffeine-<sup>15</sup>N<sub>2</sub>, were purchased from Dr. Ehrenstorfer GmbH. Stock solutions of 1 mg/mL were prepared in methanol and stored at -4°C for 6 months.

Methanol and acetonitrile were of HPLC grade and provided by Tedia Inc. (Fairfield, Ohio, USA). Ammonium formate (analytical purity) was obtained from Sinopharm Chemical Reagent Co., Ltd. (Beijing, China). Formic acid (analytical purity) was purchased from Kermel Chemical Reagent Co., Ltd. (Tianjin, China). Ammonium hydroxide (guaranteed purity) was provided by Guangfu Fine Chemical Research Institute (Tianjin, China). Diatomite was obtained from Dionex Co., Ltd. (Sunnyvale, California, USA) and combusted at 450 °C for 3 hours. Ultrapure water (18.2 MΩ·cm, 25 °C) was obtained with an OKPURE water system (Laikie Instrument Co., Ltd., Shanghai, China).

**Sample Extraction and Cleanup.** Approximately 1 g dry weight of a pooled biota sample was spiked with surrogate standards (10 ng each of sulfamethoxazole-D<sub>4</sub>, atrazine-D<sub>5</sub>, trimethoprim-D<sub>3</sub>, and ciprofloxacin-D<sub>8</sub>) before being thoroughly mixed with 3 g of diatomite. The mixture was placed into a 10 mL stainless steel extraction cell and extracted by pressurized liquid extraction (ASE 350, Dionex, Sunnyvale, California, USA) using methanol as extraction solvent. The extraction conditions were as follows: extraction temperature, 80 °C; extraction pressure, 10.48 MPa; preheating period, 5 min; static extraction, 5 min; flush volume 60% of the cell volume; nitrogen purge, 120 s; and number of extraction cycles, 2.

After extraction, approximately 21.5 mL of extract were transferred to a 50 mL round-bottom flask and concentrated to near dryness at 40 °C using a RE-2000 rotary evaporator (Yarong, Shanghai, China). The extract was diluted immediately with 50 mL of ultrapure water. The Oasis HLB cartridges (60 mg, 3 mL; 30 µm) were pre-conditioned with 5 mL of methanol and equilibrated with 2 mL of ultrapure water. After loading the samples, cartridges were washed with 12 mL of ultrapure water to remove matrix interferences and dried under vacuum for 30 min. The analytes and surrogate standards retained on the cartridges were eluted with 12 mL of methanol containing 5% ammonium hydroxide. The eluent was evaporated to near dryness at 40 °C and the residue was redissolved in 500 µL of the initial mobile phase (95% phase A: 5% phase B). The internal standard (10 ng of caffeine-<sup>15</sup>N<sub>2</sub>) was added to each sample. Samples were briefly vortexed, and filtered using a 0.22-µm syringe filter. Ten µL of extracts were injected for LC/MS/MS analysis.

**Stable Isotope Analysis.** An aliquot of approximately 1.50 mg of freeze-dried and homogenized samples were combusted in Sn capsules at 1020 °C. NO<sub>x</sub> was reduced at 650 °C, the mixed gas (N<sub>2</sub> and CO<sub>2</sub>) was separated and stable-carbon and stable-nitrogen isotope ratios were determined using an Isoprime 100 isotope ratio mass spectrometer interfaced to a vario PYRO cube elemental analyzer (Elementar, Hanau, Germany). The carbon stable-isotope ratio ( $\delta^{13}\text{C}$ ) and nitrogen stable-isotope ratio ( $\delta^{15}\text{N}$ ) of the samples are given in parts per thousand according to the formulas:

$$\delta^{15}\text{N} = \left( \frac{{}^{15}\text{N}/{}^{14}\text{N}_{\text{sample}}}{{}^{15}\text{N}/{}^{14}\text{N}_{\text{atmosphere}}} - 1 \right) \times 1000 (\text{‰}) \quad (\text{Eq. S1})$$

and

$$\delta^{13}\text{C} = \left( \frac{{}^{13}\text{C}/{}^{12}\text{C}_{\text{sample}}}{{}^{13}\text{C}/{}^{12}\text{C}_{\text{PDB}}} - 1 \right) \times 1000 (\text{‰}) \quad (\text{Eq. S2})$$

where the  ${}^{15}\text{N}/{}^{14}\text{N}_{\text{atmosphere}}$  standard value is based on atmospheric nitrogen (air) and the  ${}^{13}\text{C}/{}^{12}\text{C}_{\text{PDB}}$  standard value is based on PDB (Peedee Belemnite carbonate). Triplicate analyses of two international reference materials (IAEA-600 and USGS-43) indicate an accuracy of  $\pm 0.15\text{‰}$  and  $\pm 0.2\text{‰}$  for stable-carbon and stable-nitrogen isotope measurements, respectively.

**Estimation of Trophic Magnification Factors (TMF).** *TMF* values were determined from the slope of a regression between log-transformed antibiotic concentrations (ww) in biota and the *TLs* of the sampled biota (Eq. S3 and Eq. S4). *TMF* value of each antibiotic is shown in Table S9. A *TMF* > 1 indicates biomagnification through the food web or from prey-to-predator; otherwise, trophic dilution is suggested.

$$\log[\textit{chemical concentration}]_{\textit{ww}} = a + b \cdot \textit{TL} \quad (\text{Eq. S3})$$

$$\textit{TMF} = 10^b \quad (\text{Eq. S4})$$

**Determination of Relative Carbon Sources.** Like  $\delta^{15}\text{N}$ ,  $\delta^{13}\text{C}$  can be enriched through *TLs*. To eliminate the trophic influence of consumers on  $\delta^{13}\text{C}$  values, the relative contribution of benthic vs. pelagic carbon source (relative carbon source, Figure 2) was calculated using the following equation:<sup>1</sup>

$$\text{Relative Carbon Source} = 1 - \frac{\delta^{13}\text{C}_{\text{Acetes chinensis}} - \delta^{13}\text{C}_{\text{consumer}} + \Delta\delta^{13}\text{C}(TL_{\text{consumer}} - TL_{\text{Acetes chinensis}})}{\delta^{13}\text{C}_{\text{Acetes chinensis}} - \delta^{13}\text{C}_{\text{Rapana venosa}}} \quad (\text{Eq. S5})$$

where the northern maoxia shrimp (*Acetes chinensis*) is used as the pelagic source, the veined rapa whelk (*Rapana venosa*) represents the benthic source, and  $\Delta\delta^{13}\text{C}$  is a constant trophic enrichment factor of 1.3‰ for consumers.



**Determination of Estimated Daily Intakes (EDI).** *EDI* values for the individual antibiotics (Table S10) were calculated using the following equation and assume that 100% of the ingested antibiotics are absorbed:

$$EDI = \frac{PR \times C}{BW} \quad (\text{Eq. S6})$$

where *EDI* is the estimated daily intake of an antibiotic in ng/kg body weight (bw)/day; *PR* is the annual per capita fish consumption of 18.63 g/person/day for rural residents and 34.45 g/person/day for urban residents in China;<sup>2</sup> *BW* is the average body weight of 60 kg for an adult;<sup>3</sup> and *C* is the 90<sup>th</sup> percentile concentration of each antibiotic (ng/g ww) detected in the present study (Table S10). The 90<sup>th</sup> percentile concentrations of FQs and MLs used to calculate *EDI* values were based on the concentrations detected in all samples collected from Laizhou Bay, China. 1/2MLOD was used to calculate the *EDI* values for antibiotic levels below the MLOD. To account for the biomagnification of SAs and trimethoprim, concentration used for calculation of the *EDI* value of each antibiotic were estimated as follows:

$$C_{\text{top consumer}} = 10^{\left[ \log C_{Acetes\ chinensis} + (\log TMF) \times (TL_{\text{top consumer}} - TL_{Acetes\ chinensis}) \right]} \quad (\text{Eq. S7})$$

where  $C_{\text{top consumer}}$  is the concentration of a SA or trimethoprim in the top consumer (there are no more than 4 *TLs* in a coastal food web, *i.e.*,  $TL_{\text{top consumer}} = 4$ );  $C_{Acetes\ chinensis}$  is the 90<sup>th</sup> percentile concentration of a SA or trimethoprim in the northern maoxia shrimp (*Acetes chinensis*) ( $TL_{Acetes\ chinensis} = 2$ ); and *TMF* is the trophic magnification factor of the antibiotics estimated in the present study.

**Determination of Hazard Quotients (*HQ*).** Human health risks of rural and urban residents associated with antibiotic exposure following the consumption of seafood were assessed using hazard quotients calculated for each antibiotic with the following equation:

$$HQ = \frac{EDI}{ADI} \quad (\text{Eq. S8})$$

where *HQ* is the hazard quotient and *ADI* is the acceptable daily intake ( $\mu\text{g}/\text{kg bw}/\text{day}$ ) of an antibiotic. *ADI* values are based on a review of the data published by the World Health Organization/Food and Agriculture Organization (WHO/FAO), the Joint Expert Committee on Food Additives (JECFA), the Australian Government, Department of Health, Office of Chemical Safety (OCS), or other relevant sources. *ADIs* and *HQ* values of all 19 antibiotics are summarized in Table S10. A comparison of *HQ* values of individual antibiotics for rural *versus* urban residents is shown in Figure S4.

**Table S1.** Physicochemical properties of antibiotics investigated in this study.

| Antibiotics          | Abbreviation         | CAS number | $\log K_{ow}^a$   | $\log D^b$ | $pK_a^a$          | $f_n^b$ | Predominant ionized species at pH = 7.5 |
|----------------------|----------------------|------------|-------------------|------------|-------------------|---------|-----------------------------------------|
| Macrolides (MLs)     |                      |            |                   |            |                   |         |                                         |
| Azithromycin         | AZI                  | 83905-01-5 | 4.02              | 2.76       | 8.74              | 0.05    | Cation                                  |
| Clarithromycin       | CLA                  | 81103-11-9 | 3.16              | 1.66       | 8.99              | 0.03    | Cation                                  |
| Anhydroerythromycin  | ERY-H <sub>2</sub> O | 114-07-8   | 3.06              | 1.64       | 8.90              | 0.04    | Cation                                  |
| Roxithromycin        | ROX                  | 80214-83-1 | 2.75 <sup>j</sup> | 2.00       | 8.16 <sup>c</sup> | 0.18    | Cation                                  |
| Sulfonamides (SAs)   |                      |            |                   |            |                   |         |                                         |
| Sulfadiazine         | SDZ                  | 68-35-9    | 0.39 <sup>d</sup> | -0.24      | 6.99 <sup>d</sup> | 0.24    | Anion                                   |
| Sulfachlorpyridazine | SCP                  | 80-32-0    | 1.30 <sup>e</sup> | 0.26       | 6.50 <sup>f</sup> | 0.09    | Anion                                   |
| Sulfamonomethoxine   | SMM                  | 1220-83-3  | 0.61 <sup>c</sup> | -0.28      | 6.67 <sup>c</sup> | 0.13    | Anion                                   |
| Sulfadimethoxine     | SM2                  | 122-11-2   | 1.63 <sup>j</sup> | -0.02      | 5.86 <sup>g</sup> | 0.02    | Anion                                   |
| Sulfamethoxazole     | SMX                  | 723-46-6   | 0.89              | -0.24      | 6.40 <sup>h</sup> | 0.07    | Anion                                   |
| Sulfapyridine        | SPD                  | 144-83-2   | 0.03 <sup>c</sup> | -0.01      | 8.54 <sup>c</sup> | 0.92    | Anion                                   |
| Sulfathiazole        | ST                   | 72-14-0    | 0.05              | -0.40      | 7.24              | 0.35    | Anion                                   |
| Sulfamerazine        | SMZ                  | 127-79-7   | 0.38 <sup>c</sup> | 0.00       | 7.35 <sup>c</sup> | 0.41    | Anion                                   |
| Sulfadimidine        | SDM                  | 57-68-1    | 0.14              | -0.09      | 7.65              | 0.59    | Anion                                   |
| Trimethoprim         | TMP                  | 738-70-5   | 0.79 <sup>c</sup> | 0.09       | 6.90 <sup>c</sup> | 0.20    | Anion                                   |

**Continued Table S1.**

| Antibiotics            | Abbreviation | CAS number | $\log K_{OW}^a$    | $\log D^b$ | $pK_a^a$          | $f_n^b$ | Predominant ionized species at pH = 7.5 |
|------------------------|--------------|------------|--------------------|------------|-------------------|---------|-----------------------------------------|
| Fluoroquinolones (FQs) |              |            |                    |            |                   |         |                                         |
| Norfloxacin            | NOR          | 70458-96-7 | 0.46               | -0.81      | 8.75              | 0.05    | Cation                                  |
| Enoxacin               | ENX          | 74011-58-8 | -0.20 <sup>c</sup> | -0.97      | 8.19 <sup>c</sup> | 0.17    | Cation                                  |
| Ofloxacin              | OFL          | 82419-36-1 | -0.39              | -0.87      | 7.81 <sup>i</sup> | 0.33    | Cation                                  |
| Enrofloxacin           | ENR          | 93106-60-6 | 0.44 <sup>c</sup>  | -0.79      | 8.70 <sup>j</sup> | 0.06    | Cation                                  |
| Ciprofloxacin          | CIP          | 85721-33-1 | 0.28               | -0.98      | 8.74              | 0.05    | Cation                                  |

<sup>a</sup> Values were obtained from the Hazardous Substances Data Bank (HSDB) (available at <https://toxnet.nlm.nih.gov/newtoxnet/hsdb.htm>) unless indicated otherwise.

<sup>b</sup> pH dependent distribution coefficient ( $\log D$ ) and fraction of neutral molecules ( $f_n$ ) were calculated according to reference (4) at pH = 7.5, which is suggested to be the mean value of pH ranges in the intestinal tract of marine fish by reference (5).

<sup>c</sup> Values were calculated using Advanced Chemistry Development (ACD/I-Lab) Software 2.0 (available at <https://ilab.acdlabs.com/iLab2/>). All  $pK_a$  values are given for predominant ionized species at pH = 7.5.

<sup>d</sup> From reference (6). <sup>e</sup> From reference (7). <sup>f</sup> From reference (8). <sup>g</sup> From reference (9). <sup>h</sup> From reference (10). <sup>i</sup> From reference (11). <sup>j</sup> From reference (12). <sup>k</sup> From ChemIDplus (available at <https://chem.nlm.nih.gov/chemidplus/chemidlite.jsp>)

**Table S2.** Summary of the average body lengths and body weights of the specimens collected from Laizhou Bay, China, and the corresponding sampling locations (Figure S1) and sampling times.

| Species <sup>a</sup>                               | Sampling location <sup>b</sup> | Sampling time                      | Length (cm) <sup>c</sup> | Weight (g) <sup>c</sup> |
|----------------------------------------------------|--------------------------------|------------------------------------|--------------------------|-------------------------|
| <b>Invertebrates (9)</b>                           |                                |                                    |                          |                         |
| Veined rapa whelk ( <i>Rapana venosa</i> )         | S2, S4, S5                     | 2014/10, 2015/4                    | 8.2 ± 0.5                | 96 ± 6                  |
| Macra quadrangularis ( <i>Macra veneriformis</i> ) | S1                             | 2014/6                             | 3.3 ± 0.2                | 8.4 ± 1.6               |
| Razor clam ( <i>Sinonovacula constricta</i> )      | S3                             | 2014/6                             | 6.7 ± 0.4                | 8.5 ± 1.8               |
| Octopus ( <i>Octopus ocellatus</i> )               | S2, S4                         | 2014/10, 2015/4                    | 27.0 ± 0.2               | 90 ± 7                  |
| Mantis shrimp ( <i>Oratosquilla oratoria</i> )     | S2, S4                         | 2014/10                            | 13.7 ± 1.2               | 32 ± 4                  |
| Northern maoxia shrimp ( <i>Acetes chinensis</i> ) | S2, S5                         | 2014/10, 2015/4                    | 3.3 ± 1.6                | 1.7 ± 1.0               |
| Japanese stone crab ( <i>Charybdis japonica</i> )  | S2, S4                         | 2014/10, 2015/4                    | 7.6 ± 0.4                | 36 ± 6                  |
| Swimming crab ( <i>Portunus trituberculatus</i> )  | S2, S4                         | 2014/10, 2015/4                    | 10.3 ± 1.1               | 52 ± 10                 |
| Prawn ( <i>Fenneropenaeus chinensis</i> )          | S2                             | 2014/10, 2015/4                    | 6.7 ± 1.4                | 8.5 ± 1.8               |
| <b>Benthic fish (5)</b>                            |                                |                                    |                          |                         |
| Javeline goby ( <i>Acanthogobius hasta</i> )       | S1, S2                         | 2014/3, 2014/6,<br>2014/10, 2015/4 | 27.4 ± 2.7               | 80 ± 8                  |
| Eelgoby ( <i>Odontamblyopus rubicundus</i> )       | S4                             | 2014/6                             | 30.7 ± 2.8               | 62 ± 6                  |
| Fat greenling ( <i>Hexagrammos otakii</i> )        | S4                             | 2014/6                             | 21.5 ± 0.9               | 121 ± 7                 |
| Flathead ( <i>Platycephalus indicus</i> )          | S1, S2, S4                     | 2014/3, 2014/10                    | 42.8 ± 3.7               | 430 ± 30                |
| Tongue sole ( <i>Cymoglossus robustus</i> )        | S2, S4                         | 2014/10, 2015/4                    | 31.0 ± 2.1               | 176 ± 51                |

Continued Table S2.

| Species <sup>a</sup>                               | Sampling locations <sup>b</sup> | Sampling time           | Length (cm) <sup>c</sup> | Weight (g) <sup>c</sup> |
|----------------------------------------------------|---------------------------------|-------------------------|--------------------------|-------------------------|
| <b>Pelagic fish (5)</b>                            |                                 |                         |                          |                         |
| Halfbeak ( <i>Hemirhamphus sajori</i> )            | S4                              | 2014/10                 | 10.7 ± 1.0               | 1.9 ± 0.7               |
| Dotted gizzard shad ( <i>Konosirus punctatus</i> ) | S2                              | 2015/4                  | 18.1 ± 1.7               | 65 ± 9                  |
| Mullet ( <i>Liza haematocheilus</i> )              | S2                              | 2014/3, 2014/6, 2014/10 | 25.4 ± 1.9               | 152 ± 37                |
| Chinese sea perch ( <i>Lateolabrax maculatus</i> ) | S2                              | 2014/10, 2015/4         | 24.8 ± 2.6               | 156 ± 38                |
| Silvery pomfret ( <i>Pampus argenteus</i> )        | S5                              | 2014/10                 | 16.5 ± 1.2               | 134 ± 15                |

<sup>a</sup> The species were identified and classified using the SealifeBase database (available at <http://www.sealifebase.org>) and Checklist of Marine biota of China Seas.<sup>13</sup>

<sup>b</sup> The coordinates of longitude and latitude for sampling sites are showed in Figure S1.

<sup>c</sup> Data are presented as the mean value ± one standard deviation.

**Table S3.** Optimized LC-MS/MS parameters and retention times of the antibiotics analyzed in the present study.

| Compound <sup>a</sup> | MRM transition<br>( <i>m/z</i> ) | Fragment voltage<br>(V) | Collision energy<br>(eV) | Retention time<br>(min) |
|-----------------------|----------------------------------|-------------------------|--------------------------|-------------------------|
| AZI                   | 749.9 → 115.9                    | 215                     | 49                       | 14.7                    |
| ERY-H <sub>2</sub> O  | 716.5 → 158.2                    | 160                     | 25                       | 20.1                    |
| CLA                   | 748.9 → 158.0                    | 170                     | 29                       | 21.1                    |
| ROX                   | 838.0 → 158.0                    | 190                     | 37                       | 21.5                    |
| SDZ                   | 251.3 → 92.1                     | 100                     | 25                       | 5.0                     |
| SCP                   | 285.0 → 155.8                    | 110                     | 13                       | 10.0                    |
| SMM                   | 281.3 → 92.1                     | 120                     | 36                       | 10.3                    |
| SM2                   | 311.0 → 155.9                    | 125                     | 17                       | 13.9                    |
| SMX                   | 254.0 → 108.0                    | 105                     | 25                       | 10.7                    |
| SPD                   | 250.3 → 155.9                    | 110                     | 13                       | 6.7                     |
| ST                    | 256.0 → 155.9                    | 110                     | 13                       | 6.3                     |
| SMZ                   | 265.0 → 108.0                    | 122                     | 29                       | 7.1                     |
| SDM                   | 279.0 → 92.0                     | 112                     | 33                       | 8.8                     |
| TMP                   | 291.0 → 230.0                    | 165                     | 21                       | 8.5                     |
| ENX                   | 321.3 → 303.2                    | 130                     | 21                       | 9.2                     |
| CIP                   | 332.2 → 314.1                    | 124                     | 17                       | 9.8                     |
| ENR                   | 360.4 → 342.1                    | 134                     | 17                       | 10.7                    |

**Continued Table S3.**

| Compound <sup>a</sup>                       | MRM transition<br>( <i>m/z</i> ) | Fragment voltage<br>(V) | Collision energy<br>(eV) | Retention time<br>(min) |
|---------------------------------------------|----------------------------------|-------------------------|--------------------------|-------------------------|
| OFL                                         | 362.0 → 318.0                    | 130                     | 15                       | 9.5                     |
| NOR                                         | 320.0 → 302.0                    | 128                     | 21                       | 9.6                     |
| Sulfamethoxazole-D <sub>4</sub> (surrogate) | 258.0 → 112.0                    | 105                     | 25                       | 10.7                    |
| Atrazine-D <sub>5</sub> (surrogate)         | 221.5 → 179.4                    | 80                      | 12                       | 17.9                    |
| Trimethoprim-D <sub>3</sub> (surrogate)     | 294.4 → 123.0                    | 152                     | 21                       | 8.5                     |
| Ciprofloxacin-D <sub>8</sub> (surrogate)    | 340.2 → 235.1                    | 125                     | 44                       | 9.9                     |
| Caffeine- <sup>15</sup> N <sub>2</sub> (IS) | 197.1 → 139.1                    | 90                      | 18                       | 7.5                     |

<sup>a</sup> The full names of the compounds can be found in Table S1.



**Table S4.** Surrogate standards, linear range of matrix matched calibration curves, method detection limits (MLOD), method quantification limits (MLOQ), spiked average recoveries and relative standard deviations (RSD,  $n = 6$ ) for each antibiotic.

| Compound <sup>a</sup> | Spiked surrogate                | Range of calibration curve (ng/mL) | $r$   | MLOD <sup>b</sup> (ng/g ww) | MLOQ <sup>b</sup> (ng/g ww) | Recovery <sup>c</sup> (%) | RSD (%) |
|-----------------------|---------------------------------|------------------------------------|-------|-----------------------------|-----------------------------|---------------------------|---------|
| CIP                   | Ciprofloxacin-D <sub>8</sub>    | 2 - 2000                           | 0.998 | 1.5                         | 4.9                         | 98                        | 14      |
| ENX                   | Ciprofloxacin-D <sub>8</sub>    | 2 - 2000                           | 0.998 | 1.0                         | 3.5                         | 49                        | 18      |
| ENR                   | Ciprofloxacin-D <sub>8</sub>    | 2 - 2000                           | 0.998 | 1.1                         | 3.6                         | 97                        | 13      |
| NOR                   | Ciprofloxacin-D <sub>8</sub>    | 2 - 2000                           | 0.997 | 1.2                         | 3.9                         | 74                        | 13      |
| OFL                   | Ciprofloxacin-D <sub>8</sub>    | 2 - 2000                           | 0.998 | 0.7                         | 2.2                         | 128                       | 13      |
| AZI                   | Atrazine-D <sub>5</sub>         | 0.5 - 100                          | 0.997 | 0.3                         | 0.9                         | 111                       | 9       |
| CLA                   | Atrazine-D <sub>5</sub>         | 0.5 - 100                          | 0.997 | 0.3                         | 1.0                         | 91                        | 15      |
| ERY-H <sub>2</sub> O  | Atrazine-D <sub>5</sub>         | 0.5 - 100                          | 0.995 | 0.1                         | 0.3                         | 82                        | 11      |
| ROX                   | Atrazine-D <sub>5</sub>         | 0.5 - 100                          | 0.998 | 0.1                         | 0.4                         | 64                        | 14      |
| TMP                   | Trimethoprim-D <sub>3</sub>     | 0.1 - 100                          | 0.998 | 0.02                        | 0.08                        | 90                        | 14      |
| SMX                   | Sulfamethoxazole-D <sub>4</sub> | 1 - 1000                           | 0.999 | 0.9                         | 2.8                         | 117                       | 12      |
| SM2                   | Sulfamethoxazole-D <sub>4</sub> | 1 - 1000                           | 0.996 | 0.2                         | 0.7                         | 80                        | 18      |
| SPD                   | Sulfamethoxazole-D <sub>4</sub> | 1 - 1000                           | 0.997 | 0.3                         | 0.9                         | 113                       | 16      |

**Continued Table S4.**

| Compound <sup>a</sup> | Spiked surrogate    | Range of calibration curve (ng/mL) | <i>r</i> | MLOD <sup>b</sup> (ng/g ww) | MLOQ <sup>b</sup> (ng/g ww) | Recovery <sup>c</sup> (%) | RSD (%) |
|-----------------------|---------------------|------------------------------------|----------|-----------------------------|-----------------------------|---------------------------|---------|
| ST                    | Sulfamethoxazole-D4 | 1 - 1000                           | 0.996    | 0.5                         | 1.8                         | 67                        | 17      |
| SDM                   | Sulfamethoxazole-D4 | 1 - 1000                           | 0.998    | 0.6                         | 2.0                         | 111                       | 19      |
| SMZ                   | Sulfamethoxazole-D4 | 1 - 1000                           | 0.997    | 0.4                         | 1.2                         | 112                       | 17      |
| SDZ                   | Sulfamethoxazole-D4 | 1 - 1000                           | 0.997    | 0.5                         | 1.7                         | 110                       | 14      |
| SCP                   | Sulfamethoxazole-D4 | 1 - 1000                           | 0.997    | 0.4                         | 1.2                         | 102                       | 18      |
| SMM                   | Sulfamethoxazole-D4 | 1 - 1000                           | 0.997    | 1.5                         | 5.0                         | 114                       | 8       |

<sup>a</sup> The full names of the compounds can be found in Table S1.

<sup>b</sup> MLOD and MLOQ are defined as three and ten times the standard deviation (SD) of the mean procedure blanks ( $n = 6$ ), respectively.

<sup>c</sup> The recovery of each antibiotic was determined by analysis of six replicates of non-contaminated biotic matrix (*i.e.*, farm raised fish) spiked with a mixture of antibiotic standards. Different concentrations (5 to 250 ng/g) were spiked for each antibiotic to account for difference in response of all antibiotics during simultaneous analysis.

**Table S5.** Detection frequencies of the target antibiotics in all samples.

| Compound <sup>a</sup> | Detection frequency (%) | Compound <sup>a</sup> | Detection frequency (%) |
|-----------------------|-------------------------|-----------------------|-------------------------|
| SCP                   | 63                      | CIP                   | 23                      |
| SDZ                   | 47                      | ENX                   | 33                      |
| SM2                   | 23                      | ENR                   | 60                      |
| SMZ                   | 72                      | NOR                   | 49                      |
| SDM                   | 47                      | OFL                   | 67                      |
| SMX                   | 95                      | AZI                   | 21                      |
| SMM                   | 39                      | CLA                   | 25                      |
| SPD                   | 25                      | ERY-H <sub>2</sub> O  | 58                      |
| ST                    | 47                      | ROX                   | 23                      |
| TMP                   | 91                      |                       |                         |

<sup>a</sup> The full names of the compounds can be found in Table S1.

**Table S6.** Moisture content (%), estimated trophic level (*TL*), mean concentrations in ng/g ww (ng/g dw) of sulfonamide, fluoroquinolone, macrolide antibiotics and trimethoprim, and detection frequency (%) in different species collected from Laizhou Bay, China.

| Species                      | <i>n</i> <sup>a</sup> | Moisture content <sup>b</sup> | <i>TL</i> <sup>c</sup> | ΣSAs <sup>d</sup>                 | TMP <sup>d</sup>             | ΣFQs <sup>d</sup>        | ΣMLs <sup>d</sup>          | Total conc. <sup>d</sup> | Frequency |
|------------------------------|-----------------------|-------------------------------|------------------------|-----------------------------------|------------------------------|--------------------------|----------------------------|--------------------------|-----------|
| Mantis shrimp                | 16                    | 76                            | 3.60 ± 0.04            | 190 ± 10<br>(36 ± 2) <sup>e</sup> | 1.9 ± 0.1<br>(0.35 ± 0.02)   | 200 ± 20<br>(37 ± 3)     | 1.8 ± 0.1<br>(0.34 ± 0.03) | 390 ± 20<br>(74 ± 3)     | 47        |
| Swimming crab                | 8                     | 72                            | 3.40 ± 0.10            | 220 ± 50<br>(57 ± 13)             | 1.1 ± 0.5<br>(0.3 ± 0.1)     | 310 ± 10<br>(81 ± 3)     | 4.5 ± 1.0<br>(1.2 ± 0.3)   | 540 ± 60<br>(140 ± 20)   | 90        |
| <i>Mactra quadrangularis</i> | 34                    | 73                            | 2.60 ± 0.04            | 110 ± 5<br>(19 ± 1)               | 17 ± 2<br>(2.8 ± 0.3)        | 1,200 ± 90<br>(190 ± 10) | 3.5 ± 0.4<br>(0.6 ± 0.1)   | 1,300 ± 90<br>(220 ± 10) | 79        |
| Razor clam                   | 11                    | 81                            | 2.50 ± 0.05            | 21 ± 2<br>(4.1 ± 0.3)             | 34 ± 20<br>(6.6 ± 4.0)       | 450 ± 40<br>(88 ± 8)     | nd                         | 500 ± 50<br>(98 ± 9)     | 47        |
| Japanese stone crab          | 13                    | 79                            | 3.40 ± 0.10            | 170 ± 13<br>(35 ± 3)              | 4.0 ± 3.0<br>(0.8 ± 0.7)     | 160 ± 40<br>(33 ± 8)     | 3.9 ± 4.0<br>(0.8 ± 0.7)   | 340 ± 30<br>(70 ± 6)     | 74        |
| Veined rapa whelk            | 15                    | 77                            | 2.30 ± 0.06            | 82 ± 7<br>(22 ± 2)                | 8.9 ± 2.0<br>(2.4 ± 0.5)     | 330 ± 40<br>(90 ± 10)    | 0.7 ± 1.0<br>(0.2 ± 0.3)   | 420 ± 40<br>(110 ± 10)   | 47        |
| Northern maoxia shrimp       | 49                    | 74                            | 2.00 ± 0.10            | 51 ± 6<br>(12 ± 2)                | 0.30 ± 0.02<br>(0.07 ± 0.01) | nd <sup>f</sup>          | 13 ± 3<br>(2.9 ± 0.8)      | 64 ± 10<br>(15 ± 2)      | 53        |
| Prawn                        | 11                    | 81                            | 3.20 ± 0.30            | 77 ± 30<br>(22 ± 7)               | 1.6 ± 0.8<br>(0.2 ± 0.3)     | 190 ± 30<br>(54 ± 9)     | 3.7 ± 1.0<br>(1.1 ± 0.3)   | 270 ± 40<br>(77 ± 10)    | 47        |
| Octopus                      | 3                     | 83                            | 3.50 ± 0.06            | 350 ± 60<br>(83 ± 14)             | 0.5 ± 0.2<br>(0.12 ± 0.04)   | 68 ± 4<br>(16 ± 1)       | 4.4 ± 2.0<br>(1.1 ± 0.5)   | 420 ± 50<br>(100 ± 10)   | 79        |

Continued Table S6.

| Species             | $n^a$ | Moisture content <sup>b</sup> | $TL^c$          | $\Sigma SAs^d$             | TMP <sup>d</sup>               | $\Sigma FQ^d$              | $\Sigma MLs^d$                 | Total conc. <sup>d</sup>   | Frequency |
|---------------------|-------|-------------------------------|-----------------|----------------------------|--------------------------------|----------------------------|--------------------------------|----------------------------|-----------|
| Fat greenling       | 6     | 41                            | $3.50 \pm 0.02$ | $290 \pm 30$<br>(69 ± 6)   | $2.4^g$<br>$0.6^g$             | $92 \pm 5$<br>(22 ± 1)     | nd <sup>f</sup>                | $380 \pm 20$<br>(91 ± 6)   | 21        |
| Javeline goby       | 17    | 73                            | $4.00 \pm 0.03$ | $110 \pm 30$<br>(22 ± 7)   | $2.0 \pm 2.0$<br>(0.4 ± 0.5)   | $100 \pm 2$<br>(21 ± 0.4)  | $0.2 \pm 0.3$<br>(0.05 ± 0.07) | $210 \pm 40$<br>(44 ± 8)   | 42        |
| Flathead            | 3     | 79                            | $3.90 \pm 0.06$ | $340 \pm 40$<br>(70 ± 9)   | $2.0 \pm 2.0$<br>(0.4 ± 0.4)   | $48 \pm 30$<br>(10 ± 7)    | $1.4 \pm 1.0$<br>(0.3 ± 0.2)   | $390 \pm 60$<br>(81 ± 10)  | 37        |
| Eelgoby             | 7     | 78                            | $3.50 \pm 0.01$ | $440 \pm 10$<br>(100 ± 2)  | $2.2 \pm 0.2$<br>(0.51 ± 0.04) | $130 \pm 30$<br>(30 ± 8)   | nd                             | $580 \pm 40$<br>(130 ± 10) | 42        |
| Tongue sole         | 15    | 77                            | $3.30 \pm 0.30$ | $110 \pm 70$<br>(25 ± 16)  | $5.2 \pm 3.0$<br>(1.2 ± 0.7)   | $94 \pm 20$<br>(21 ± 4)    | $1.2 \pm 1.0$<br>(0.3 ± 0.3)   | $210 \pm 50$<br>(47 ± 10)  | 47        |
| Chinese sea perch   | 17    | 79                            | $3.90 \pm 0.30$ | $310 \pm 140$<br>(74 ± 30) | $5.4 \pm 4.0$<br>(1.3 ± 1.0)   | $16 \pm 10$<br>(3.8 ± 2.0) | $7.5 \pm 4.0$<br>(1.8 ± 1.0)   | $340 \pm 150$<br>(81 ± 30) | 37        |
| Mullet              | 11    | 76                            | $3.20 \pm 0.20$ | $100 \pm 9$<br>(22 ± 2)    | $1.3 \pm 1.0$<br>(0.3 ± 0.2)   | $12 \pm 7$<br>(3 ± 2)      | $0.4 \pm 0.6$<br>(0.1 ± 0.1)   | $110 \pm 20$<br>(26 ± 4)   | 32        |
| Silvery pomfret     | 6     | 69                            | $4.10 \pm 0.02$ | $150 \pm 20$<br>(46 ± 5)   | $6.4 \pm 0.3$<br>(2.0 ± 0.1)   | $84 \pm 30$<br>(26 ± 8)    | $3.2 \pm 1.0$<br>(1.0 ± 0.4)   | $240 \pm 20$<br>(75 ± 6)   | 68        |
| Dotted gizzard shad | 6     | 78                            | $3.30 \pm 0.03$ | $100 \pm 10$<br>(62 ± 7)   | $20 \pm 20$<br>(7.7 ± 10.0)    | $93 \pm 10$<br>(55 ± 6)    | $4.2 \pm 2.0$<br>(2.5 ± 1.0)   | $210 \pm 30$<br>(130 ± 20) | 26        |
| Halfbeak            | 32    | 76                            | $2.20 \pm 0.10$ | $52 \pm 20$<br>(14 ± 6)    | $5.0 \pm 1.0$<br>(1.3 ± 0.3)   | $86 \pm 20$<br>(23 ± 5)    | $5.7 \pm 1.0$<br>(1.5 ± 0.3)   | $150 \pm 40$<br>(40 ± 10)  | 68        |

<sup>a</sup>  $n$  is the number of organisms sampled for each species, and three different homogenized samples were analyzed for each species.

<sup>b</sup> Water content was calculated based on the difference between wet and dry weights.

<sup>c</sup> *TL* values were calculated using equation (2) as described in data analysis of the text and presented as the mean value  $\pm$  one standard deviation.

<sup>d</sup>  $\Sigma$ SAs: sum of sulfonamide antibiotics; TMP: trimethoprim;  $\Sigma$ FQs: sum of fluoroquinolone antibiotics;  $\Sigma$ MLs: sum of macrolide antibiotics;

Total conc.: sum of all antibiotics investigated in this study. All concentrations are presented as the mean value  $\pm$  one standard deviation.

<sup>e</sup> Concentrations on a dry weight basis for each species are given in parentheses.

<sup>f</sup> nd: value below MLOD.

<sup>g</sup> Analyte was detected in only one pooled sample.

**Table S7.** Comparison of antibiotic levels detected in aquatic animals in areas around the world.

| Study region                                  | Collected species <sup>a</sup>                    | Antibiotic class <sup>b</sup> | Conc. Range (ng/g ww)                     | Reference  |
|-----------------------------------------------|---------------------------------------------------|-------------------------------|-------------------------------------------|------------|
| Laizhou Bay, North China                      | Fish and invertebrates<br>(n = 280)               | ∑SAs + TMP                    | nd <sup>e</sup> - 453 (170 <sup>c</sup> ) | This study |
|                                               |                                                   | ∑FQs                          | nd - 1,200 (190)                          |            |
|                                               |                                                   | ∑MLs                          | nd - 15 (2.9)                             |            |
| Coastal areas,<br>Hailing Island, South China | Shrimps, crabs, mollusks, and fish<br>(n = 39)    | ∑SAs + TMP                    | nd - 58.6                                 | (14)       |
|                                               |                                                   | ∑FQs                          | nd - 153.2                                |            |
|                                               |                                                   | ∑MLs                          | nd - 15,093                               |            |
| Coastal areas, Dalian,<br>North China         | <i>Crassostrea gigas</i> and scallops<br>(n = 13) | ∑SAs                          | 2.18 - 63.87                              | (15)       |
|                                               |                                                   | ∑CAPs                         | nd - 4.03                                 |            |
| Bohai Sea, North China                        | Mollusks<br>(n = 190)                             | ∑SAs                          | nd - 76.7(6.0) <sup>d</sup>               | (16)       |
|                                               |                                                   | ∑FQs                          | 0.7 - 1,575.1(86.8) <sup>d</sup>          |            |
|                                               |                                                   | ∑MLs                          | nd - 36.2(2.6) <sup>d</sup>               |            |
| Baiyangdian Lake, North China                 | Crustacean and fish<br>(n = 23)                   | ∑SAs                          | nd - 98.3 <sup>d</sup>                    | (17)       |
|                                               |                                                   | ∑FQs                          | 17.8 - 167 <sup>d</sup>                   |            |
|                                               |                                                   | ∑MLs                          | nd - 182 <sup>d</sup>                     |            |
| Rivers, Pearl River Delta, China              | Fish<br>(n = 128)                                 | ∑SAs                          | nd - 9.3                                  | (18)       |
|                                               |                                                   | ∑FQs                          | nd - 19.0                                 |            |
|                                               |                                                   | ∑MLs                          | nd - 2.36 (< 0.49)                        |            |

**Continued Table S7.**

| Study region             | Collected species <sup>a</sup>       | Antibiotic class <sup>b</sup> | Conc. Ranges (ng/g ww)       | Reference |
|--------------------------|--------------------------------------|-------------------------------|------------------------------|-----------|
| Haihe River, North China | Fish<br>( <i>n</i> = 10)             | ∑SAs                          | nd - 996 <sup>d</sup>        | (19)      |
|                          |                                      | ∑FQs                          | nd - 63.5 <sup>d</sup>       |           |
|                          |                                      | ∑MLs                          | nd - 45.1 (7.8) <sup>d</sup> |           |
| Aquatic markets, Canada  | Shrimps and fish<br>( <i>n</i> = 30) | ∑FQs                          | nd - 0.73                    | (20)      |
|                          |                                      | ∑CAPs                         | nd - 0.4                     |           |
| Rivers, USA              | Fish ( <i>n</i> = 144)               | SMX + TMP                     | nd                           | (21)      |
| Rivers, Germany          | Bream ( <i>n</i> = 20)               | SMX + TMP                     | nd                           | (22)      |
| Coastal areas, Ireland   | Mussels ( <i>n</i> = 45)             | TMP                           | nd - 9.22 <sup>d</sup>       | (23)      |

<sup>a</sup> Numbers in parenthesis are the number of analyzed samples.

<sup>b</sup> ∑SAs: sum of sulfonamide antibiotics; SMX: sulfamethoxazole; TMP: trimethoprim; ∑FQs: sum of fluoroquinolone antibiotics; ∑MLs: sum of macrolide antibiotics; ∑CAPs: sum of chloramphenicol antibiotics.

<sup>c</sup> Values in parentheses are the mean concentrations.

<sup>d</sup> Concentrations are reported by ng/g dry weight.

<sup>e</sup> nd: value below MLOD.



**Table S8.** Analysis of variance (ANOVA) of the calculated trophic level (*TL*) values at different sampling times  
(*i.e.*, June 2014, October 2014 and April 2015) by SPSS 19.0.<sup>a</sup>

|                | Sum of Squares | Df | Mean Square | F     | Sig.  |
|----------------|----------------|----|-------------|-------|-------|
| Between Groups | 0.313          | 2  | 0.157       | 0.394 | 0.678 |
| Within Groups  | 11.916         | 30 | 0.397       |       |       |
| Total          | 12.230         | 32 |             |       |       |

<sup>a</sup> *TL* values of a species derived from isotope determination with at least two different sampling times are used in this analysis.

**Table S9.** Slope, correlation coefficients ( $r$ ) and  $p$ -values of regression analyses between logarithm concentrations and trophic levels (see Figure 3), and  $TMFs$  and 95% confidence intervals (CIs) of target antibiotics and  $\Sigma SAs$ ,  $\Sigma FQs$ ,  $\Sigma MLs$ .

| Antibiotic <sup>a</sup>   | slope | $r$            | $p$ -value                  | $TMF$ <sup>c</sup> | 95% CI     |
|---------------------------|-------|----------------|-----------------------------|--------------------|------------|
| SCP                       | 0.52  | 0.93           | < <b>0.001</b> <sup>b</sup> | 3.3                | 2.5 - 4.5  |
| SDZ                       | 0.57  | 0.83           | <b>0.003</b>                | 3.7                | 1.8 - 7.6  |
| SM2                       | 0.14  | - <sup>e</sup> | 0.624                       | 1.4                | 0.2 - 9.2  |
| SMZ                       | 0.45  | -              | 0.368                       | 2.8                | 0.3 - 30.4 |
| SDM                       | 0.59  | 0.77           | <b>0.016</b>                | 3.9                | 1.4 - 10.7 |
| SMX                       | 0.34  | 0.85           | < <b>0.001</b>              | 2.2                | 1.7 - 2.9  |
| SMM                       | 0.15  | 0.65           | <b>0.036</b>                | 1.4                | 1.0 - 1.9  |
| SPD                       | 0.09  | 0.80           | 0.065                       | 1.2                | 1.0 - 1.6  |
| ST                        | 0.09  | 0.54           | 0.061                       | 1.2                | 1.0 - 1.5  |
| $\Sigma SAs$ <sup>d</sup> | 0.42  | 0.78           | < <b>0.001</b>              | 2.6                | 1.7 - 4.0  |
| TMP                       | 0.38  | 0.54           | <b>0.019</b>                | 2.4                | 1.2 - 4.8  |
| CIP                       | -0.36 | -              | 0.459                       | 0.4                | 0.0 - 9.5  |
| ENX                       | -0.28 | 0.66           | <b>0.044</b>                | 0.5                | 0.3 - 1.0  |
| ENR                       | -0.40 | 0.76           | <b>0.003</b>                | 0.4                | 0.2 - 0.7  |
| NOR                       | -0.09 | -              | 0.481                       | 0.8                | 0.4 - 1.6  |

**Continued Table S9.**

| Antibiotic <sup>a</sup> | slope          | <i>r</i> | <i>p</i> -value           | <i>TMF</i> <sup>c</sup> | 95% CI    |
|-------------------------|----------------|----------|---------------------------|-------------------------|-----------|
| OFL                     | -0.42          | 0.77     | <b>0.001</b> <sup>b</sup> | 0.4                     | 0.2 - 0.6 |
| ΣFQs <sup>d</sup>       | -0.48          | 0.69     | <b>0.002</b>              | 0.3                     | 0.2 - 0.6 |
| AZI                     | -0.16          | 0.88     | <b>0.031</b>              | 0.7                     | 0.5 - 0.9 |
| CLA                     | -0.02          | -        | 0.900                     | 1.0                     | 0.3 - 2.6 |
| ERY-H <sub>2</sub> O    | -0.20          | 0.66     | <b>0.013</b>              | 0.6                     | 0.5 - 0.9 |
| ROX                     | - <sup>e</sup> | -        | -                         | -                       | -         |
| ΣMLs <sup>d</sup>       | -0.32          | 0.81     | <b>0.001</b>              | 0.5                     | 0.3 - 0.7 |
| Total <sup>d</sup>      | -0.14          | 0.22     | 0.205                     | 0.7                     | 0.4 - 1.2 |

<sup>a</sup> The full names of the compounds can be found in Table S1.

<sup>b</sup> *p*-values in bold print represent statistically significant increases or decreases of the wet weight concentration (*i. e.*, < 0.05).

<sup>c</sup> *TMF* values were calculated using Eq. S3 and Eq. S4 as described above.

<sup>d</sup> ΣSAs: sum of sulfonamide antibiotics; ΣFQs: sum of fluoroquinolone antibiotics; ΣMLs: sum of macrolide antibiotics; Total: sum of all antibiotics investigated in this study.

<sup>e</sup> -: not available.

**Table S10.** 90<sup>th</sup> percentile antibiotic concentrations (*C*), estimation daily intake (*EDI*) values and associated hazard quotients (*HQ*) of antibiotics for rural and urban residents and acceptable daily intake (*ADI*) values obtained from the literature.

| Antibiotic <sup>a</sup> | <i>C</i> <sup>b</sup><br>(ng/g ww) | <i>EDI</i> <sup>c</sup> (ng/kg bw/d) |       | <i>HQ</i> <sup>d</sup> × 10 <sup>2</sup> |       | <i>ADI</i><br>(µg/kg bw/d) | Reference |
|-------------------------|------------------------------------|--------------------------------------|-------|------------------------------------------|-------|----------------------------|-----------|
|                         |                                    | urban                                | rural | urban                                    | rural |                            |           |
| SCP                     | 39.8                               | 22.9                                 | 12.4  | -                                        | -     | - <sup>e</sup>             | -         |
| SDZ                     | 3.5                                | 2.0                                  | 1.1   | 0.01                                     | 0.005 | 20                         | (24)      |
| SM2                     | 1.8                                | 1.1                                  | 0.6   | 0.01                                     | 0.006 | 10                         | (25)      |
| SMZ                     | 38.1                               | 21.9                                 | 11.8  | -                                        | -     | -                          | -         |
| SDM                     | 36.0                               | 20.7                                 | 11.2  | 0.04                                     | 0.02  | 50                         | (26)      |
| SMX                     | 160.9                              | 92.4                                 | 50.0  | 0.2                                      | 0.09  | 57                         | (27)      |
| SMM                     | 14.3                               | 8.2                                  | 4.4   | 0.1                                      | 0.07  | 6.0                        | (24)      |
| SPD                     | 1.9                                | 1.1                                  | 0.6   | 0.03                                     | 0.02  | 3.3                        | (27)      |
| ST                      | 4.0                                | 2.3                                  | 1.3   | 0.005                                    | 0.003 | 50                         | (28)      |
| TMP                     | 1.8                                | 1.0                                  | 0.6   | 0.02                                     | 0.01  | 4.0                        | (28)      |
| ΣSAs <sup>e</sup>       | -                                  | -                                    | -     | 0.4                                      | 0.2   | -                          | -         |
| CIP                     | 27.8                               | 16.0                                 | 8.6   | 1.0                                      | 0.5   | 1.6                        | (29)      |
| ENX                     | 32.0                               | 18.4                                 | 9.9   | -                                        | -     | -                          | -         |
| ENR                     | 250.9                              | 144.1                                | 77.9  | 7.2                                      | 3.9   | 2.0                        | (30)      |
| NOR                     | 115.9                              | 66.6                                 | 36.0  | 0.6                                      | 0.3   | 11.4                       | (27)      |

**Continued Table S10.**

| Antibiotic <sup>a</sup> | <i>C</i> <sup>b</sup><br>(ng/g ww) | <i>EDI</i> <sup>c</sup> (ng/kg bw/d) |       | <i>HQ</i> <sup>d</sup> × 10 <sup>2</sup> |       | <i>ADI</i><br>(µg/kg bw/d) | Reference |
|-------------------------|------------------------------------|--------------------------------------|-------|------------------------------------------|-------|----------------------------|-----------|
|                         |                                    | urban                                | rural | urban                                    | rural |                            |           |
| OFL                     | 49.4                               | 28.4                                 | 15.4  | 0.5                                      | 0.3   | 5.7                        | (27)      |
| ΣFQs                    | -                                  | - <sup>e</sup>                       | -     | 9.4                                      | 5.0   | -                          | -         |
| AZI                     | 1.7                                | 1.0                                  | 0.5   | 0.06                                     | 0.03  | 1.7                        | (31)      |
| CLA                     | 3.6                                | 2.1                                  | 1.1   | 1.0                                      | 0.6   | 0.2                        | (32)      |
| ERY-H <sub>2</sub> O    | 2.5                                | 1.4                                  | 0.8   | 0.2                                      | 0.1   | 0.7                        | (33)      |
| ROX                     | 0.8                                | 0.5                                  | 0.3   | 0.1                                      | 0.07  | 0.4                        | (34)      |
| ΣMLs                    | -                                  | -                                    | -     | 1.4                                      | 0.8   | -                          | -         |

<sup>a</sup> The full names of the compounds can be found in Table S1.

<sup>b</sup> For SAs and TMP, concentration used to calculate the *EDI* value of each antibiotic (*C*) was estimated using Eq. S7 as described above. For FQs and MLs, *C* was the 90<sup>th</sup> percentile concentration of each antibiotic detected in the present study. 1/2MLOD was used to calculate the *EDI* values for antibiotic levels below the MLOD.

<sup>c</sup> *EDIs* were calculated using Eq. S6 as described above based on the consumption of a diet containing only seafood.

<sup>d</sup> *HQ* values were calculated using Eq. S8 as described above.

<sup>e</sup> -: not available.

<sup>f</sup>ΣSAs: TMP was included based on similar mode of action (MOA) between SAs and TMP.

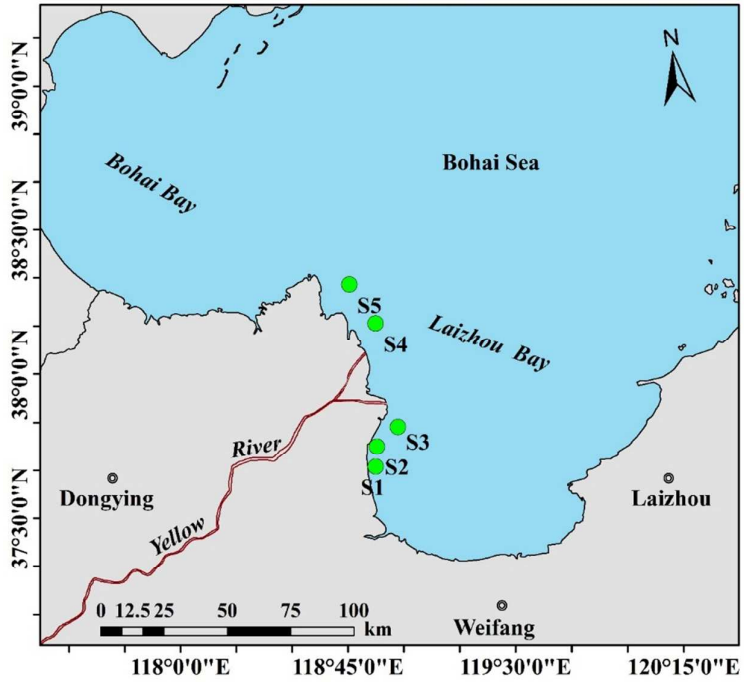

Figure S1. Sampling locations of this study.

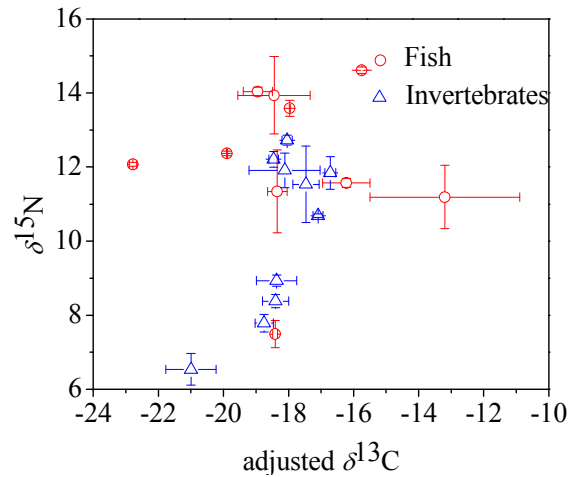

**Figure S2.**  $\delta^{15}\text{N}$  and adjusted  $\delta^{13}\text{C}$  values for the species in the coastal food web from Laizhou Bay, China.  $\delta^{15}\text{N}$  and  $\delta^{13}\text{C}$  values were calculated using Eq. S1 and Eq. S2, respectively, as described above. All  $\delta^{13}\text{C}$  values were mathematically adjusted for the C/N ratios obtained during the determination of the stable-isotope ratios as described in equation (1).



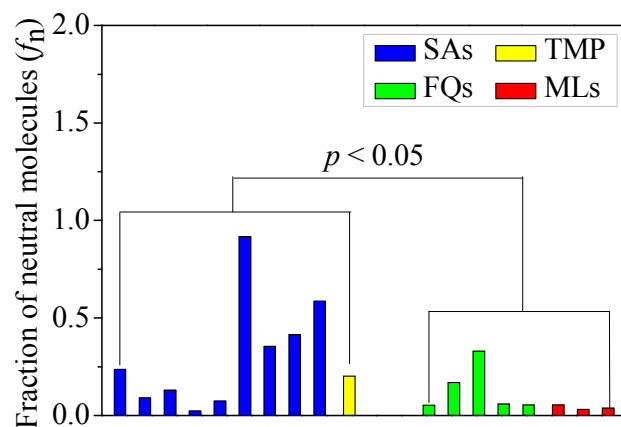

**Figure S3.** Significant difference ( $p < 0.05$ ) on fraction of neutral molecules ( $f_n$ ) values between SA antibiotics (including TMP) and the other two antibiotic groups (*i.e.*, FQs and MLs).  $f_n$  values of antibiotics (Table S1) were calculated using an equation described in Fu et al. at pH = 7.5, which is the mean value of pH ranges in the intestinal tract of marine fish reported by Ou et al.<sup>4,5</sup>

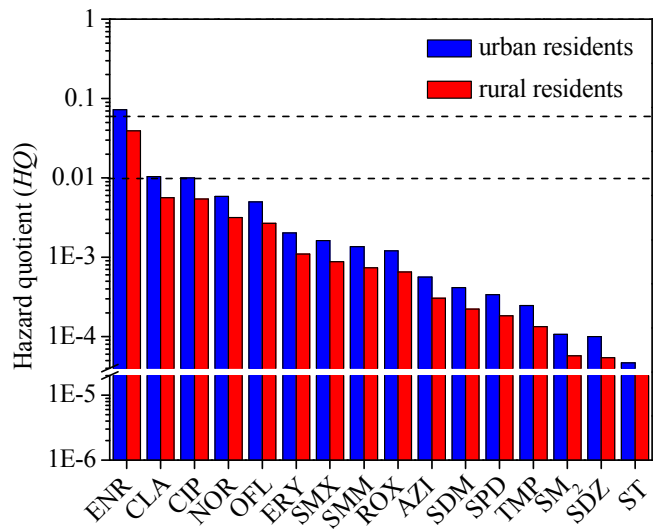

**Figure S4.** Hazard quotients ( $HQ$ ) of antibiotics for rural and urban residents based on consumption of seafood only. Dotted lines represent threshold values of a considerable risk (*i.e.*,  $HQ = 0.01$ ) and a distinct risk (*i.e.*,  $HQ = 0.05$ ), respectively.

## References

- (1) McKinney, M. A.; McMeans, B. C.; Tomy, G. T.; Rosenberg, B.; Ferguson, S. H.; Morris, A.; Muir, D. C. G.; Fisk, A. T. Trophic transfer of contaminants in a changing arctic marine food web: Cumberland Sound, Nunavut, Canada. *Environ. Sci. Technol.* **2012**, *46* (18), 9914-9922; DOI 10.1021/es302761p.
- (2) National Bureau of Statistics of China; <http://data.stats.gov.cn>. Access date: July 2016.
- (3) Lee, M. M.; Wu-Williams, A.; Whittemore, A. S.; Zheng, S.; Gallagher, R.; Teh, C. Z.; Zhou, L.; Wang, X. H.; Chen, K.; Ling, C. D.; Jiao, D. A.; Jung, D.; Paffenbarger-Jr, R. S. Comparison of dietary habits, physical activity and body size among Chinese in North America and China. *Int. J. Epidemiol.* **1994**, *23* (5), 984- 990; DOI 10.1093/ije/23.5.984.
- (4) Fu, W. J.; Franco, A.; Trapp, S. Methods for estimating the bioconcentration factor of ionizable organic chemicals. *Environ. Toxicol. Chem.* **2009**, *28* (7), 1372-1379; DOI 10.1897/08-233.1.
- (5) Ou, Y. J.; Luo, Q.; Li, J. E. On digestive enzyme activity of *Trachinotus ovatus* III Effects of pH on activity in young and adult fish. *Marine Fisheries* (Chinese). **2010**, *32* (4), 417-421; DOI 10.13233/j.cnki.mar.fish.2010.04.009.
- (6) The Human Metabolome Database (HMDB); <http://www.hmdb.ca/>. Access date: Nov 2016.
- (7) Boxall, A. B. A.; Kay, P.; Blackwell, P. A. Livestock Farming and the Environment: Assessing the environmental fate and effects of veterinary medicines. Conference workshop series: Proceedings of Workshop 4 on Sustainable Animal Production, held at Hannover, September 28, 2000.

- (8) Thomaidis, N. S.; Gago-Ferrero, P.; Ort, C.; Maragou, N. C.; Alygizakis, N. A.; Borova, V. L. Dasenaki, M. E. Reflection of socioeconomic changes in wastewater: licit and illicit drug use patterns. *Environ. Sci. Technol.* **2016**, *50* (18), 10065-10072; DOI 10.1021/acs.est.6b02417.
- (9) Lin, C. E.; Chang, C. C.; Lin, W. C. Migration behavior and separation of sulfonamides in capillary zone electrophoresis III. Citrate buffer as a background electrolyte. *J. Chromatogr. A.* **1997**, *768* (1), 105-112; DOI 10.1016/S0021-9673(97)00010-1.
- (10) Ye, S.; Yao, Z. W.; Na, G. S.; Wang, J. Y.; Ma, D. Y. Rapid simultaneous determination of 14 sulfonamides in wastewater by liquid chromatography tandem mass spectrometry. *J. Sep. Sci.* **2007**, *30* (15), 2360-2369; DOI 10.1002/jssc.200600539.
- (11) Völgyi, G.; Ruiz, R.; Box, K.; Comer, J.; Bosch, E.; Takács-Nováka, K. Potentiometric and spectrophotometric pKa determination of water-insoluble compounds: validation study in a new cosolvent system. *Anal. Chim. Acta.* **2007**, *583* (2), 418-428; DOI 10.1016/j.aca.2006.10.015.
- (12) Lizondo, M.; Pons, M.; Gallardo, M.; Estelrich, J. Physicochemical properties of enrofloxacin. *J. Pharm. Biomed. Anal.* **1997**, *15* (12), 1845-1849; DOI 10.1016/S0731-7085(96)02033-X.
- (13) Liu, R. Y. *Checklist of Marine Biota of China Seas*. Science Press: Academia Sinica, Beijing, China, 2008.
- (14) Chen, H.; Liu, S.; Xu, X. R.; Liu, S. S.; Zhou, G. J.; Sun, K. Y.; Zhao, J. L.; Ying, G. G. Antibiotics in typical marine aquaculture farms surrounding Hailing Island, South China: Occurrence, bioaccumulation and human dietary exposure. *Mar. Pollut. Bull.* **2015**, *90* (1-2), 181-187; DOI 10.1016/j.marpolbul.2014.10.053.

- (15)Na, G. S.; Fang, X. D.; Cai, Y. Q.; Ge, L. K.; Zong, H. M.; Yuan, X. T.; Yao, Z. W.; Zhang, Z. F. Occurrence, distribution, and bioaccumulation of antibiotics in coastal environment of Dalian, China. *Mar. Pollut. Bull.* **2013**, *69* (1-2), 233-237; DOI 10.1016/j.marpolbul.2012.12.028.
- (16)Li, W. H.; Shi, Y. L.; Gao, L. H.; Liu, J. M.; Cai, Y. Q. Investigation of antibiotics in mollusks from coastal waters in the Bohai Sea of China. *Environ. Pollut.* **2012**, *162*, 56-62; DOI 10.1016/j.envpol.2011.10.022.
- (17)Li, W. H.; Shi, Y. L.; Gao, L. H.; Liu, J. M.; Cai, Y. Q. Occurrence of antibiotics in water, sediments, aquatic plants, and animals from Baiyangdian Lake in North China. *Chemosphere.* **2012**, *89* (11), 1307-1315; DOI 10.1016/j.chemosphere.2012.05.079.
- (18)Zhao, J. L.; Liu, Y. S.; Liu, W. R.; Jiang, Y. X.; Su, H. C.; Zhang, Q. Q.; Chen, X. W.; Yang, Y. Y.; Chen, J.; Liu, S. S.; Pan, C. G.; Huang, G. Y.; Ying, G. G. Tissue-specific bioaccumulation of human and veterinary antibiotics in bile, plasma, liver and muscle tissues of wild fish from a highly urbanized region. *Environ. Pollut.* **2015**, *198*, 15-24; DOI 10.1016/j.envpol.2014.12.026.
- (19)Gao, L. H.; Shi, Y. L.; Li, W. H.; Liu, J. M.; Cai, Y. Q. Occurrence, distribution and bioaccumulation of antibiotics in the Haihe River in China. *J. Environ. Monitor.* **2012**, *14* (4), 1248-1255; DOI 10.1039/c2em10916f.
- (20)Tittlemier, S. A.; Van de Riet, J.; Burns, G.; Potter, R.; Murphy, C.; Rourke, W.; Pearce, H.; Dufresne, G. Analysis of veterinary drug residues in fish and shrimp composites collected during the Canadian Total Diet Study, 1993-2004. *Food Addit. Contam.* **2007**, *24* (1), 14-20; DOI 10.1080/02652030600932937.
- (21)Ramirez, A. J.; Brain, R. A.; Usenko, S.; Mottaleb, M. A.; O'Donnell, J. G.; Stahl, L. L.; Wathen, J. B.; Snyder, B. D.; Pitt, J. L.; Perez-Hurtado, P.; Dobbins, L. L.;

Brooks, B. W.; Chambliss, C. K. Occurrence of pharmaceuticals and personal care products in fish: Results of a national pilot study in the United States. *Environ. Toxicol. Chem.* **2009**, 28 (12), 2587-2597; DOI 10.1897/08-561.1.

(22) Subedi, B.; Du, B. W.; Chambliss, C. K.; Koschorreck, J.; Rudel, H.; Quack, M.; Brooks, B. W.; Usenko, S. Occurrence of pharmaceuticals and personal care products in German fish tissue: A national study. *Environ. Sci. Technol.* **2012**, 46 (16), 9047-9054; DOI 10.1021/es301359t.

(23) McEneff, G.; Barron, L.; Kelleher B.; Paull, B.; Quinn, B. A. A year-long study of the spatial occurrence and relative distribution of pharmaceutical residues in sewage effluent, receiving marine waters and marine bivalves. *Sci. Total Environ.* **2014**, 476, 317-326; DOI 10.1016/j.scitotenv.2013.12.123.

(24) *ADI List: Acceptable daily intakes for agricultural and veterinary chemicals*; ISSN 1446-1412; Australian Government, Department of Health, Office of Chemical Safety (OCS): Canberra, ACT, 2015; [http://www.health.gov.au/internet/main/publishing.nsf/Content/6279C451E3D11E89CA257BF0001DAAE7/\\$File/ADI%20List\\_updated%20to%2031%20Dec%202015.pdf](http://www.health.gov.au/internet/main/publishing.nsf/Content/6279C451E3D11E89CA257BF0001DAAE7/$File/ADI%20List_updated%20to%2031%20Dec%202015.pdf).

Access date: April 2016.

(25) Simazaki, D.; Hiramatsu, S.; Fujiwara, J.; Akiba, M.; Kunikane, S. Monitoring priority of residual pharmaceuticals in water sources and drinking water in Japan. *J. Water Environ. Technol.* **2014**, 12 (3), 275-283; DOI 10.2965/jwet.2014.275.

(26) *Evaluation of certain veterinary drug residues in food: 48th meeting report of the Joint FAO/WHO Expert Committee on Food Additives*; ISSN 0512-3054; Food and Agriculture Organization of the United Nations, World Health Organization (FAO/WHO): Geneva, Switzerland, 1995;

[http://apps.who.int/iris/bitstream/10665/37341/1/WHO\\_TRS\\_851.pdf](http://apps.who.int/iris/bitstream/10665/37341/1/WHO_TRS_851.pdf). Access date: April 2016.

(27) *Residues of Some Veterinary Drugs in Foods and Animals*; Food and Agriculture Organization of the United Nations, World Health Organization (FAO/WHO): Rome, Italy, 2011.

(28) Schwab, B. W.; Hayes, E. P.; Fiori, J. M.; Mastrocco, F. J.; Roden, N. M.; Cragin, D.; Meyerhoff, R. D.; D'Aco, V. J.; Anderson, P. D. Human pharmaceuticals in US surface waters: a human health risk assessment. *Reg. Toxicol. Pharmacol.* **2005**, *42*, 296-312; DOI 10.1016/j.yrtph.2005.05.005.

(29) Younghee, K.; Jinyong, J.; Myunghyun, K.; Park, J.; Boxall, A. B. A.; Choi, K. Prioritizing veterinary pharmaceuticals for aquatic environment in Korea. *Environ. Toxicol. Pharmacol.* **2008**, *26* (2), 167-176; DOI 10.1016/j.etap.2008.03.006.

(30) *Evaluation of certain veterinary drug residues in food: 48th meeting report of the Joint FAO/WHO Expert Committee on Food Additives*; ISSN 0512-3054; Food and Agriculture Organization of the United Nations, World Health Organization (FAO/WHO): Geneva, Switzerland, 1998; [http://apps.who.int/iris/bitstream/10665/42127/1/WHO\\_TRS\\_879.pdf](http://apps.who.int/iris/bitstream/10665/42127/1/WHO_TRS_879.pdf). Access date: April 2016.

(31) Kitris, M. D.; Goldstein, F. W.; Miégi, M.; Acar, J. F. *In-vitro* activity of azithromycin against various Gram-negative bacilli and anaerobic bacteria. *J. Antimicrob. Chemother.* **1990**, *25* (Suppl. A), 15-18; DOI 10.1093/jac/25.suppl\_A.15.

(32) Citron, D. M.; Appleman, M. D. 2001. Comparative *in vitro* activities of ABT-773 against 362 clinical isolates of anaerobic bacteria. *Antimicrob. Agents Chemother.* **2001**, *45*, 345-348; DOI 10.1128/AAC.45.1.345-348.2001.

(33) *Evaluation of certain veterinary drug residues in food: 66th meeting report of the Joint FAO/WHO Expert Committee on Food Additives*; ISSN 0512-3054; Food and Agriculture Organization of the United Nations, World Health Organization (FAO/WHO): Geneva, Switzerland, 2006; [http://apps.who.int/iris/bitstream/10665/43464/1/9241209399\\_eng.pdf](http://apps.who.int/iris/bitstream/10665/43464/1/9241209399_eng.pdf). Access date: April 2016.

(34) Dubreuil, L. *In-vitro* comparison of roxithromycin and erythromycin against 900 anaerobic bacterial strains. *J. Antimicrob. Chemother.* **1987**, *20* (Suppl B), 13-19; DOI 10.1093/jac/20.suppl\_B.13.
